# Supplementary material for: A dual-targeting bio-liposomes nanodrug repair endothelial cell dysfunction and restore macrophage cholesterol flow homeostasis to treat early atherosclerosis
Source: Research Square preprint supplement (doi:10.21203/rs.3.rs-5830667/v1), 2025-04-17
Supplement: Supplementary file 1 [file 8c4627f3e63c092b1cff600c.docx]

**A dual-targeting** **bio-liposomes nanodrug repair endothelial cell dysfunction and restore macrophage** **cholesterol flow homeostasis to treat early atherosclerosis**

Qi Zhang1,2†, Shengchao Ma1,2†, Xue Kang4, Yi Liu2,5, Fei Ma2,5, Feifei Yu2,5, Xiaolan Luo1,2, Guizhong Li2,5, Yinju Hao2,6, Huiping Zhang6,7*, Bin Liu2,3*, Yideng Jiang2,5*

1School of Inspection, Ningxia Medical University, Yinchuan, 750004, China

2NHC Key Laboratory of Metabolic Cardiovascular Diseases Research, Ningxia Medical University, Yinchuan, 750004, China

3College of Biology, Hunan University, Changsha, 410082, China

4Department of Clinical Medicine, Ningxia Medical University, Yinchuan, 750004, China

5School of Basic Medical Sciences, Ningxia Medical University, Yinchuan, 750004, China

6Medical Experimental Center, General Hospital of Ningxia Medical University, Yinchuan, 750004, China

7Department of Medical Genetics, Hunan Provincial Maternal and Child Health Hospital, Changsha, 410008, China

† Qi Zhang and Shengchao Ma contributed equally to this work.

*Corresponding authors:

Huiping Zhang

E-mail addresses: zhp19760820@163.com

Bin Liu

E-mail addresses: binliu2001@hotmail.com

Yideng Jiang

E-mail addresses: jydeng@nxmu.edu.cn

# Fig. S1


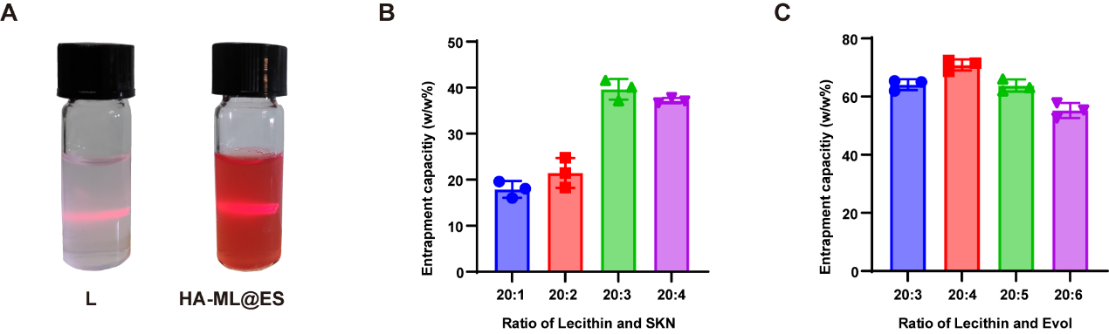


**Fig. S1** Encapsulation rates of SKN and Evol. (A) The images of L NPs and HA-ML@ES NPs (B&C) SKN and Evol entrapment efficiency of L@ES NPs

# Fig. S2


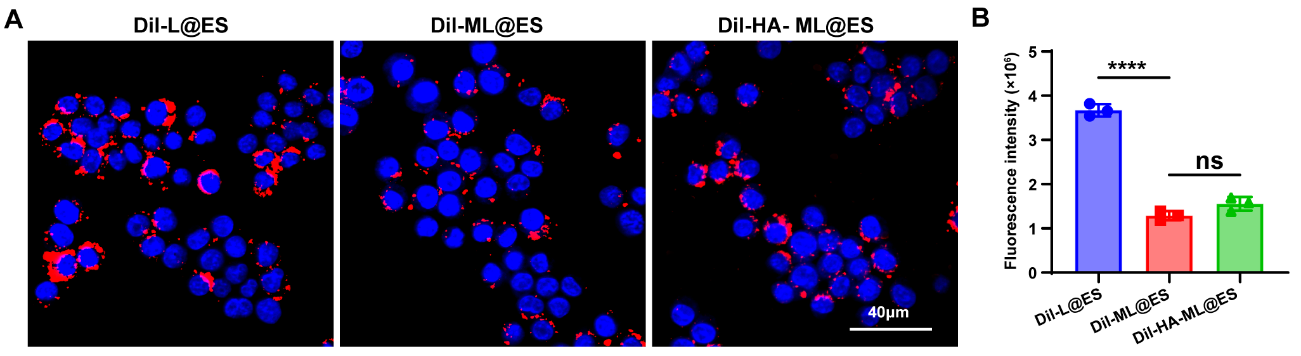


**Fig. S2** Fluorescence images of the immune evading ability of Dil-HA-ML@ES NPs with quantitative data at right (n=3). Scale bar = 40 μm. Date are mean ± SD (n=3) **P*<0.05, ***P*<0.01, ****P*<0.001, *****P*<0.0001.

# Fig. S3


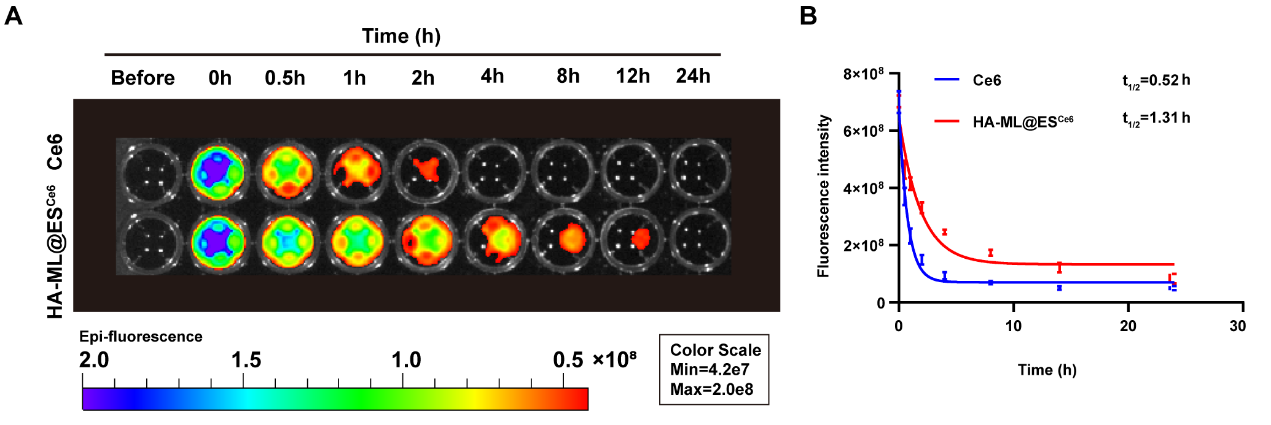


**Fig. S3** Pharmacokinetics of HA-ML@ES NPs.(A) Fluorescence images of Ce6 and HA-ML@ESCe6 NPs in the blood at different time points. (B) Pharmacokinetic curves of Ce6 and HA-ML@ESCe6 NPs in Kunming mice. Date are mean ± SD (n=3).

# Fig. S4


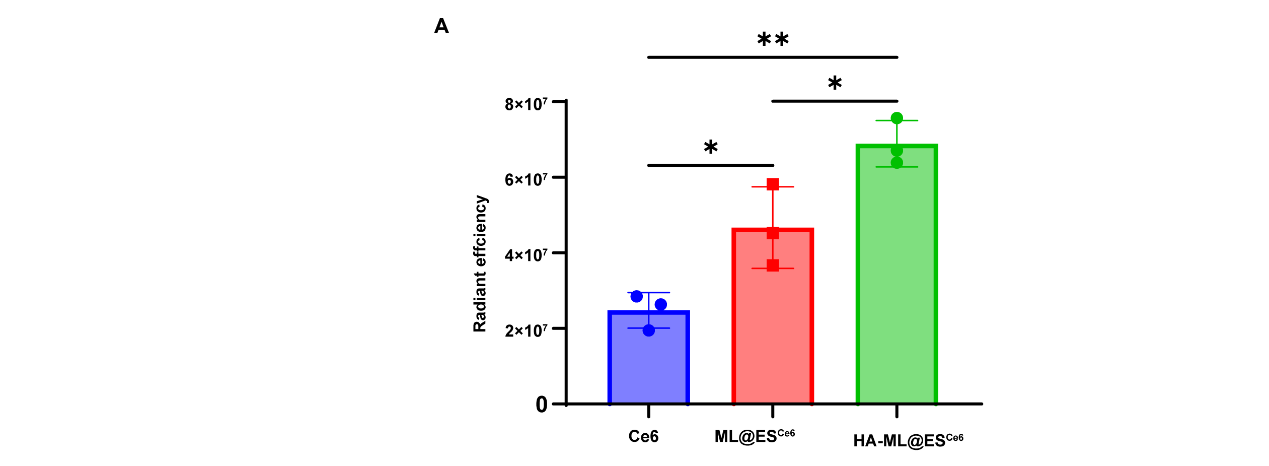


**Fig. S4** Ex vivo quantitative fluorescence analysis of Ce6 fluorescence in aortas 12 h after Ce6, ML@ESCe6 NPs and HA-ML@ESCe6 NPs injection into ApoE-/- atherosclerotic mice.

# Fig. S5


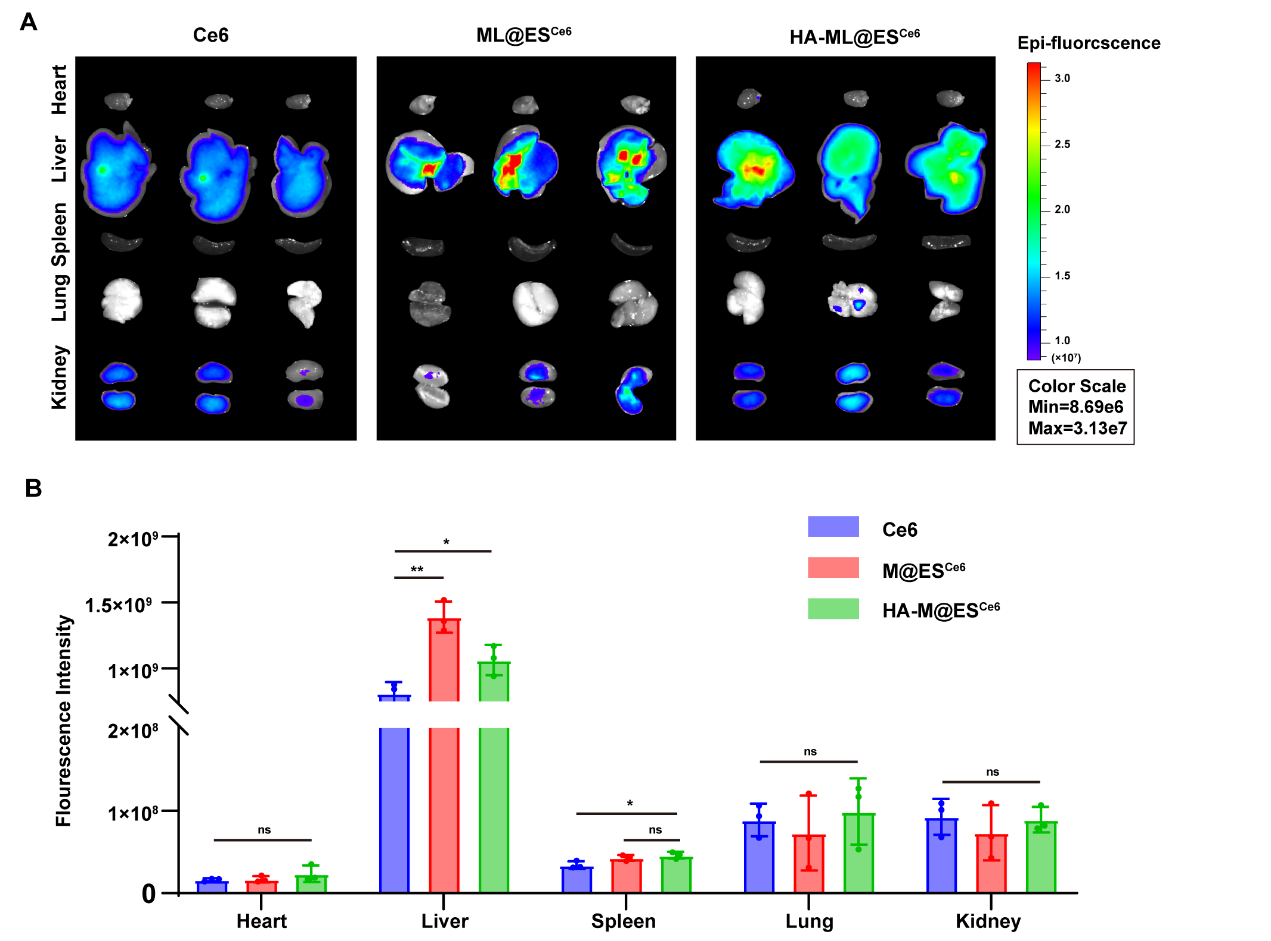


**Fig. S5** Organs distribution of Ce6, ML@ESCe6 NPs and HA-ML@ESCe6 NPs after i.v. administration. (A) The fluorescence images and (B) quantitative analysis of the major organs excised from the ApoE-/- mice. Date are mean ± SD (n=3) **P*<0.05, ***P*<0.01, ****P*<0.001, *****P*<0.0001.

# Fig. S6


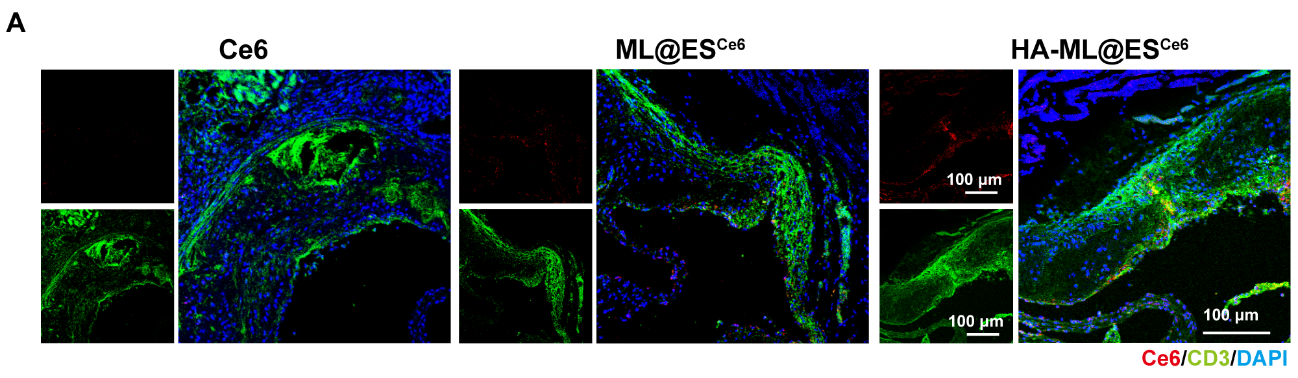


**Fig. S6** CLSM analysis of the co-location of Ce6, ML@ESCe6 NPs and HA-ML@ESCe6 NPs (red) and T cells (green)) in atherosclerotic plaques (n=3)

# Fig. S7


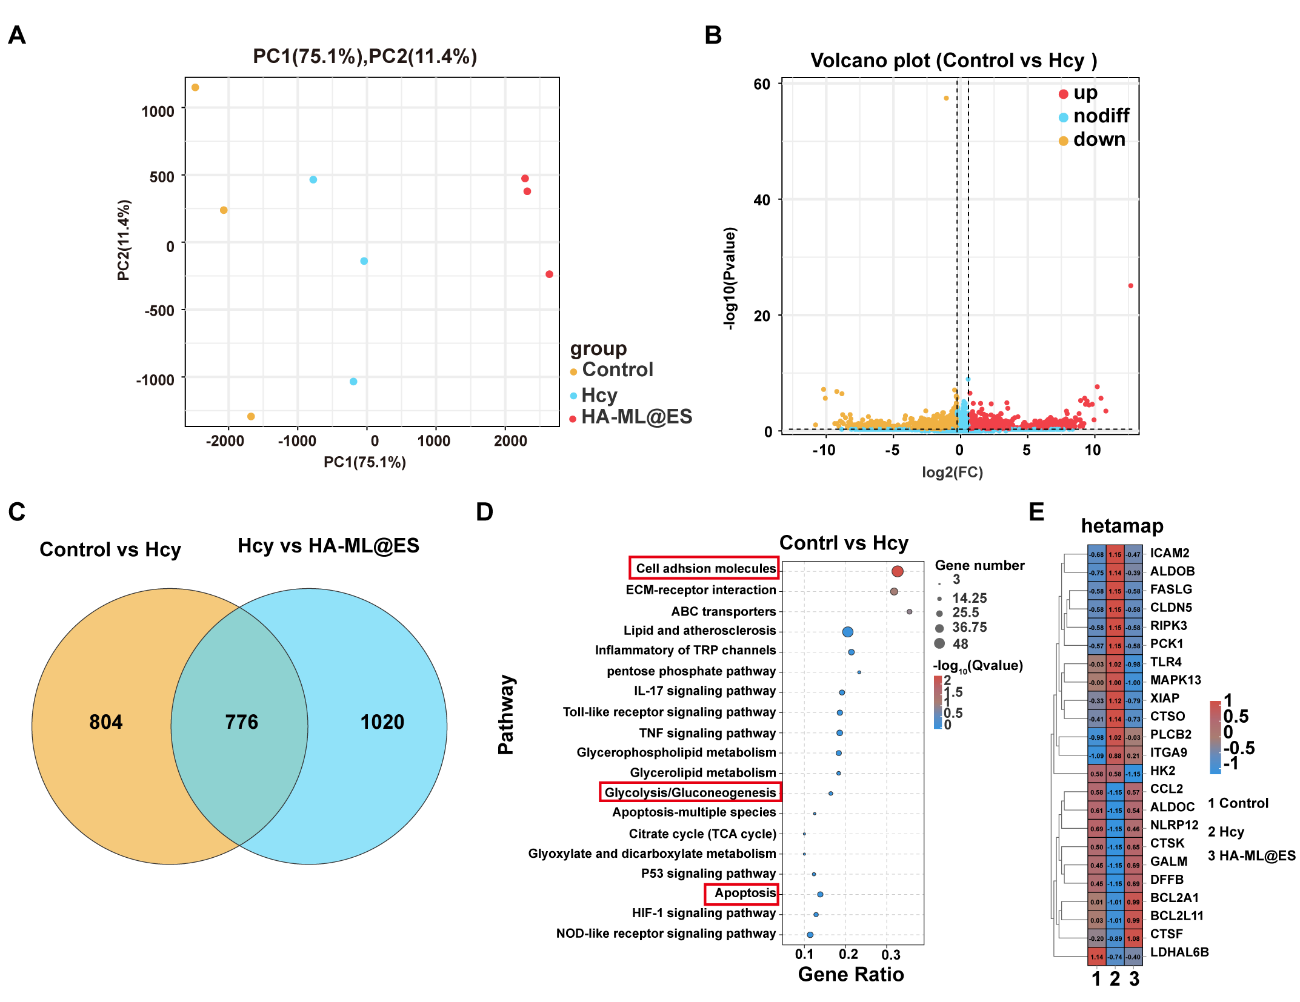


**Fig. S7** Transcriptome sequencing analysis of HUVECs treated with HA-ML@ES NPs.(A) Principal component analysis (PCA) plots of Control, Hcy and HA-ML@ES NPs in HUVECs. (B) Volcano plots showing the distribution of differentially expressed genes in HUVECs treated with Control and Hcy. (C) Venn diagram showing co-expression genes in HUVECs treated with Control, Hcy and HA-ML@ES NPs. (D) Compared with the control, Hcy group Kyoto Encyclopedia of Genes and Genomes (KEGG) analysis of upregulated and downregulated cellular pathways in HUVECs. (E) Shared differentially regulated genes in HUVECs treated with Control, Hcy and HA-ML@ES NPs.

# Fig. S8


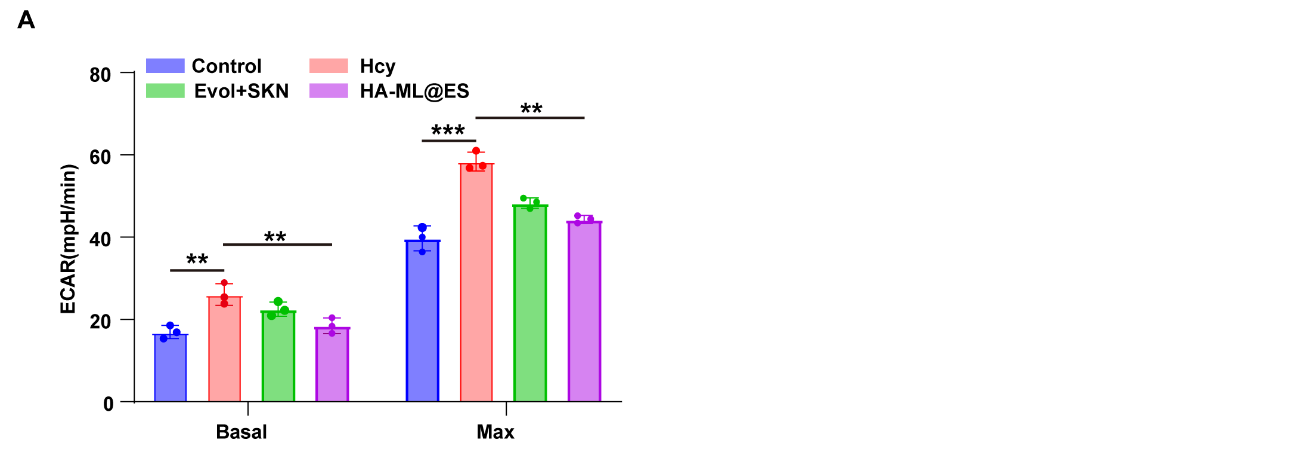


**Fig.** **S8** Quantitative analysis of ECAR profile showing glycolytic function in HUVECs under different treatment. [Hcy]=100 μM. Vertical lines indicate the time of addition of glucose (10 mM), oligomycin (1 μM), and 2-DG (50 mM) (n=3) (n=3). Date are presented as mean ± SD ***P*<0.01, ****P*<0.001.

# Fig. S9


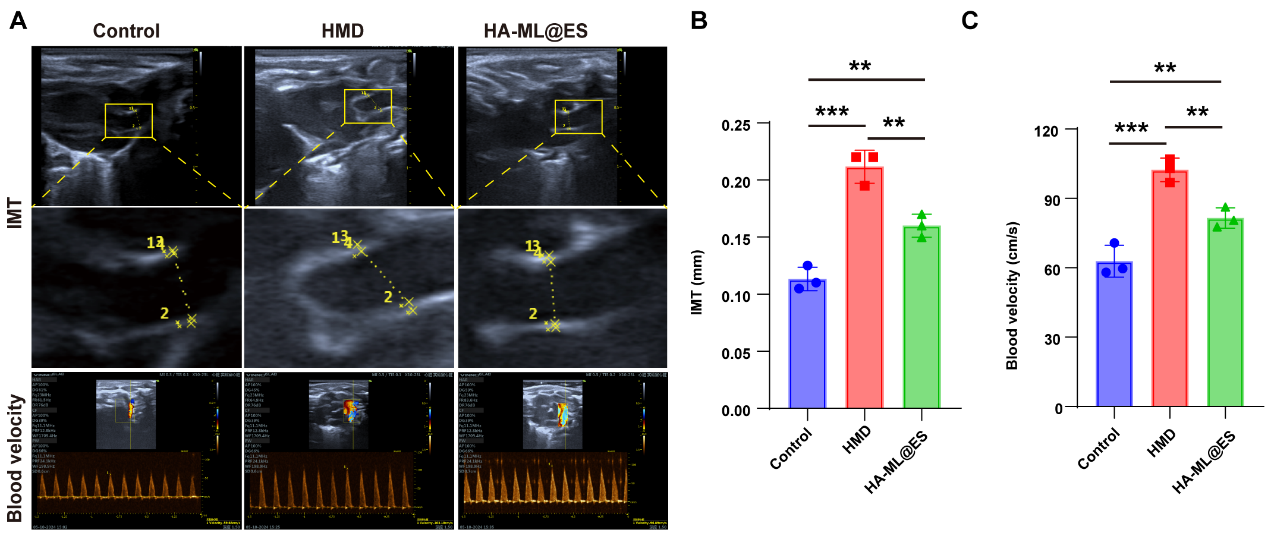


**Fig. S9.** IMT and Blood Velocity in AS Mice Observed on Ultrasound Images After Treatment with HA-ML@ES NPs.(A-C) Representative ultrasound images of the aortas. The yellow line represents the thickness of the intima at the root of the aorta in IMT, and the yellow line represents the direction of blood of the aorta. Date are mean ± SD (n=3) **P*<0.05, ***P*<0.01, ****P*<0.001.

# Fig. S10


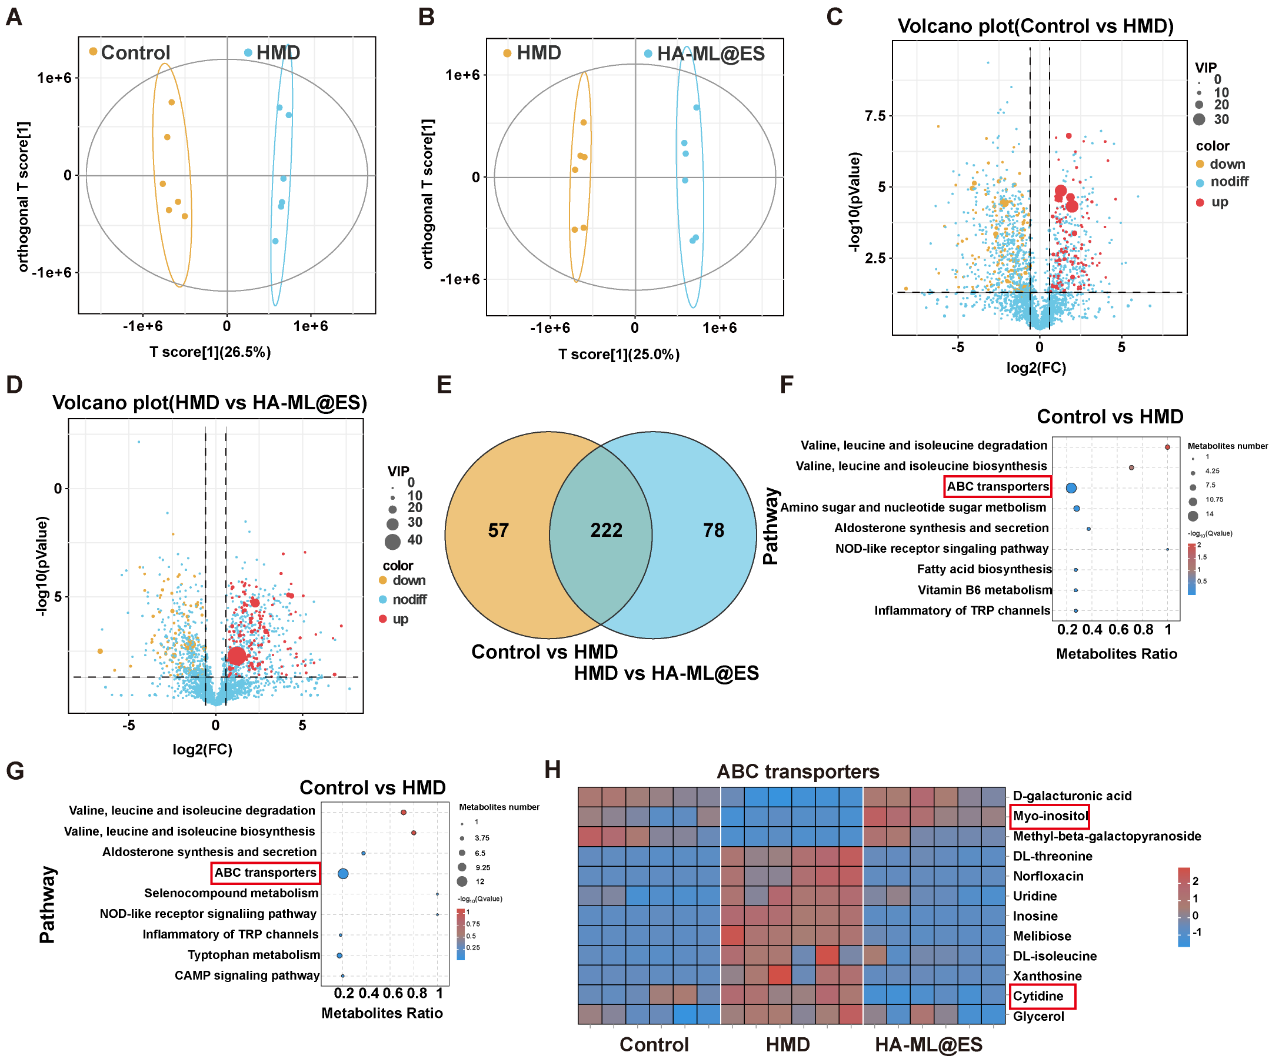


**Fig. S10** Metabolomics profiling of the serum upon HA-ML@ES NPs treatment in ApoE-/- atherosclerotic mice. (A&B) Orthogonal partial least-squares discriminant analysis (OPLS-DA) of serum metabolomics. (C&D) Volcano plots showing the distribution of differentially expressed serum metabolism in Control, HMD and HA-ML@ES NPs groups. (E) Venn diagram showing co-expression serum metabolism in Control, HMD and HA-ML@ES NPs groups. (F&G) Compared with the control, HMD and HA-ML@ES NPs groups KEGG analysis of upregulated and downregulated pathways in serum metabolism. (H&I) Shared deferentially regulated serum metabolism treated with Control, HMD and HA-ML@ES NPs (n=6).

# Fig. S11


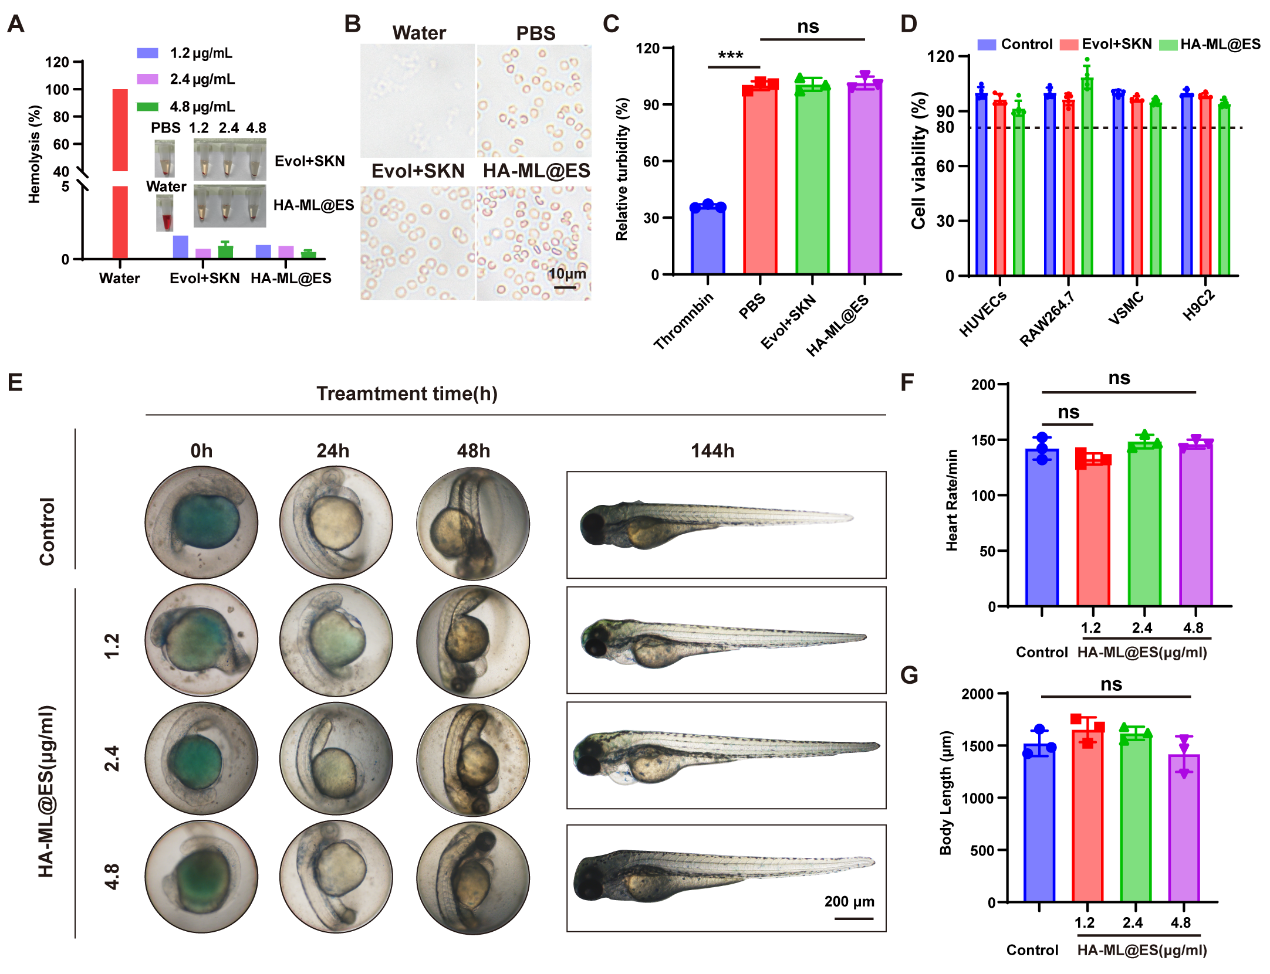


**Fig. S11.** In vitro cytotoxicity and hemolytic evaluation of HA-ML@ES NPs. (A&B) Hemolysis analysis of blood samples and microscopy image of RBCs after exposure to water (Positive control), PBS (negative control), Evol+SKN and HA-ML@ES NPs (1.2, 2.4 and 4.8 μg/mL) for 6 h (n= 3). Scale bar = 10 μm. (C) Platelet aggregation assay with PBS Evol+SKN and HA-ML@ES NPs (n=3). (D) Cell viability values of Evol+SKN and HA-ML@ES on HUVECs, RAW264.7, VSMCs, and H9C2 (n=5). (E-G) Morphological images, heart rate, and body length changes of zebrafish incubated with PBS, and HA-ML@ES NPs (1.2, 2.4 and 4.8 μg/mL) for 24, 48, and 144 hours (n=3). Date are mean ± SD (n=3)

# Fig. S12


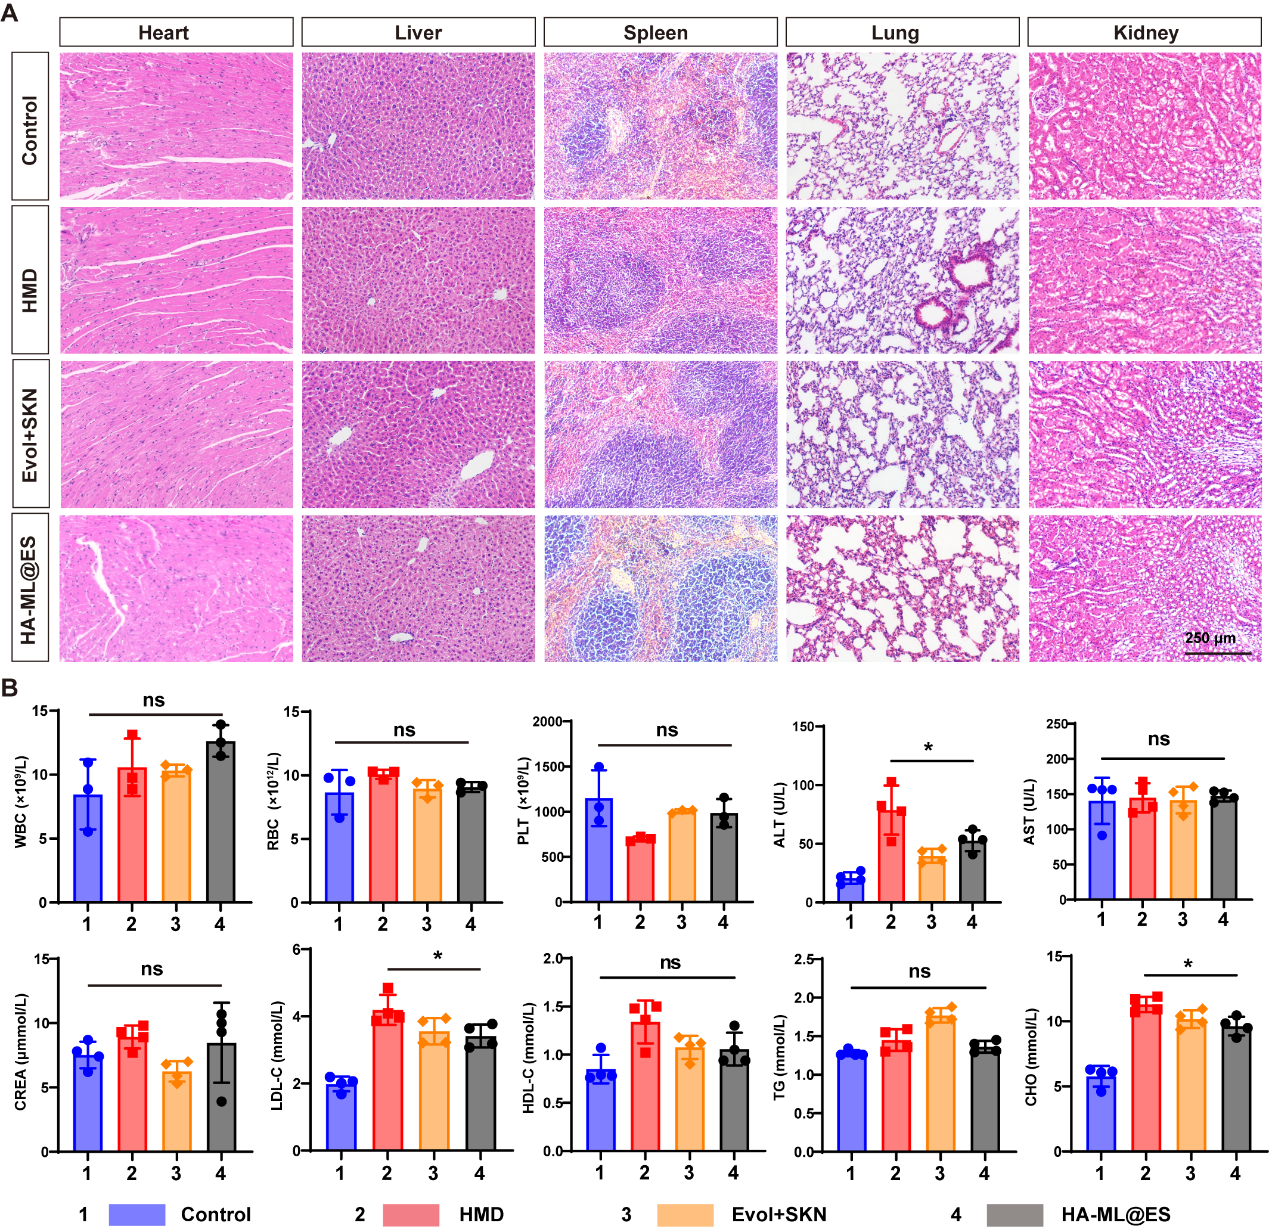


**Fig. S12.** Organ toxicity investigation and liver and kidney function and blood lipids tests of mice with HA-ML@ES NPs treatment. (A) H&E staining of major organs (heart, liver, spleen, lung, kidney,) from the indicated groups. Scale bar = 250 μm (n=3). (B) WBC, RBC, HGB, PLT (n = 3) and TG, CHO, ALT, AST, HCY, HDL-C, LDL-C, CREA levels in mice with indicated treatments (n = 4). Date are mean ± SD *P<0.05.
